# Supplementary material for: Association of Physical Activity with the Risk of Hepatocellular Carcinoma in Patients with Chronic Hepatitis B
Source: MDPI journal article supplement (doi:10.3390/cancers13143424), 2021-07-08

## **Supplementary Materials**

**Association of physical activity with the risk of hepatocellular carcinoma in patients with chronic hepatitis B**

**Supplementary Table S1.** Definition of diagnosis

**Supplementary Table S2.** Multivariable analysis for HCC development in total study population

**Supplementary Fig. S1.** Physical activity of patients with and without cirrhosis

**Supplementary Fig. S2.** Comparison of physical activity between male and female

**Supplementary Table S1.** Definition of diagnosis

| Variable                  | Definition                                                                                                                                                                                                                                                                                                                                                                                                                                                                                                                                                                                                                                                                                                                                                                                                                                                                                                                                                                 |
|---------------------------|----------------------------------------------------------------------------------------------------------------------------------------------------------------------------------------------------------------------------------------------------------------------------------------------------------------------------------------------------------------------------------------------------------------------------------------------------------------------------------------------------------------------------------------------------------------------------------------------------------------------------------------------------------------------------------------------------------------------------------------------------------------------------------------------------------------------------------------------------------------------------------------------------------------------------------------------------------------------------|
| <b>Exclusion criteria</b> |                                                                                                                                                                                                                                                                                                                                                                                                                                                                                                                                                                                                                                                                                                                                                                                                                                                                                                                                                                            |
| HCV coinfection           | ICD-10 code: B18.2                                                                                                                                                                                                                                                                                                                                                                                                                                                                                                                                                                                                                                                                                                                                                                                                                                                                                                                                                         |
| HIV coinfection           | ICD-10 codes: B20-B24                                                                                                                                                                                                                                                                                                                                                                                                                                                                                                                                                                                                                                                                                                                                                                                                                                                                                                                                                      |
| Cancer                    | ICD-10 codes: C00-C97                                                                                                                                                                                                                                                                                                                                                                                                                                                                                                                                                                                                                                                                                                                                                                                                                                                                                                                                                      |
| <b>Covariables</b>        |                                                                                                                                                                                                                                                                                                                                                                                                                                                                                                                                                                                                                                                                                                                                                                                                                                                                                                                                                                            |
| Cirrhosis                 | ICD-10 code: K7290, K7291, K74, K740, K7400, K7401, K7402, K7409                                                                                                                                                                                                                                                                                                                                                                                                                                                                                                                                                                                                                                                                                                                                                                                                                                                                                                           |
| Diabetes mellitus         | ICD-10 codes: E100, E1000, E1001, E1002, E1003, E1008, E101, E1010, E1011, E1012, E1018, E102, E1020, E1021, E1022, E1028, E103, E1031, E1032, E1033, E1034, E1038, E104, E1040, E1041, E1042, E1048, E105, E1050, E1051, E1058, E106, E1060, E1061, E1062, E1063, E1064, E1068, E107, E1070, E1071, E1072, E1078, E108, E109, E11, E110, E1100, E1101, E1102, E1103, E1108, E111, E1110, E1111, E1112, E1118, E112, E1120, E1121, E1122, E1128, E113, E1131, E1132, E1133, E1134, E1138, E114, E1140, E1141, E1142, E1148, E115, E1150, E1151, E1158, E116, E1160, E1161, E1162, E1163, E1164, E1168, E117, E1170, E1171, E1172, E1178, E118, E119, E14, E140, E1400, E1401, E1402, E1403, E1408, E141, E1410, E1411, E1412, E1418, E142, E1420, E1421, E1422, E1428, E143, E1431, E1432, E1433, E1434, E1438, E144, E1440, E1441, E1442, E1448, E145, E1450, E1451, E1458, E146, E1460, E1461, E1462, E1463, E1464, E1468, E147, E1470, E1471, E1472, E1478, E148, E149. |
| Hypertension              | ICD-10 codes: I10, I101, I109, I11, I110, I119, I12, I120, I129, I13, I130, I131, I132, I139, I15, I150, I151, I152, I1520, I1521, I1522, I1528, I158, I1580, I1588, I159                                                                                                                                                                                                                                                                                                                                                                                                                                                                                                                                                                                                                                                                                                                                                                                                  |
| <b>Outcomes</b>           |                                                                                                                                                                                                                                                                                                                                                                                                                                                                                                                                                                                                                                                                                                                                                                                                                                                                                                                                                                            |
| HCC                       | ICD-10 code C22 with the special cancer claim code V193                                                                                                                                                                                                                                                                                                                                                                                                                                                                                                                                                                                                                                                                                                                                                                                                                                                                                                                    |

**Supplementary Table S2.** Multivariable analysis for HCC development in total study population (n=9,727)

|                                 | HR        | 95% CI    | <i>P</i> value |
|---------------------------------|-----------|-----------|----------------|
| Physical activity               |           |           |                |
| Totally sedentary               | Reference |           |                |
| < 500 MET-min/week              | 0.82      | 0.68–0.99 | 0.039          |
| 500–1,000 MET-min/week          | 0.74      | 0.61–0.89 | 0.002          |
| 1,000–1,500 MET-min/week        | 0.64      | 0.50–0.84 | 0.001          |
| ≥ 1,500 MET-min/week            | 0.70      | 0.51–0.97 | 0.032          |
| Antiviral therapy               |           |           |                |
| Entecavir                       | Reference |           |                |
| Tenofovir                       | 0.89      | 0.77–1.02 | 0.101          |
| Age                             | 1.04      | 1.03–1.05 | <0.001         |
| Sex (female vs male)            | 0.67      | 0.55–0.82 | <0.001         |
| Diabetes mellitus               | 1.36      | 1.03–1.80 | 0.032          |
| Hypertension                    | 1.39      | 1.09–1.77 | 0.009          |
| Body mass index                 | 1.03      | 1.01–1.06 | 0.004          |
| Smoking                         |           |           |                |
| Never                           | Reference |           |                |
| Previous                        | 1.01      | 0.82–1.25 | 0.904          |
| Current                         | 1.32      | 1.09–1.62 | 0.006          |
| Significant alcohol consumption | 1.33      | 0.99–1.79 | 0.057          |

|                       |       |             |        |
|-----------------------|-------|-------------|--------|
| AST                   | 1.000 | 0.998–1.001 | 0.779  |
| ALT                   | 0.998 | 0.996–0.999 | 0.005  |
| GGT                   | 1.002 | 1.002–1.003 | <0.001 |
| Fasting blood glucose | 1.000 | 0.998–1.003 | 0.687  |
| LDL cholesterol       | 0.995 | 0.993–0.997 | <0.001 |

---

Abbreviations: ALT, Alanine aminotransferase; AST, aspartate aminotransferase; CI, confidence interval; GGT, gamma-glutamyl transferase; HCC, hepatocellular carcinoma; HR, hazard ratio; LDL, low-density lipoprotein; MET, metabolic equivalent of task. .

**Supplementary Fig. S1.** The proportions of physical activity classified into 5 categories stratified by the presence of cirrhosis. There was no significant difference of the proportions of physical activity between the two groups ( $P=0.10$ )

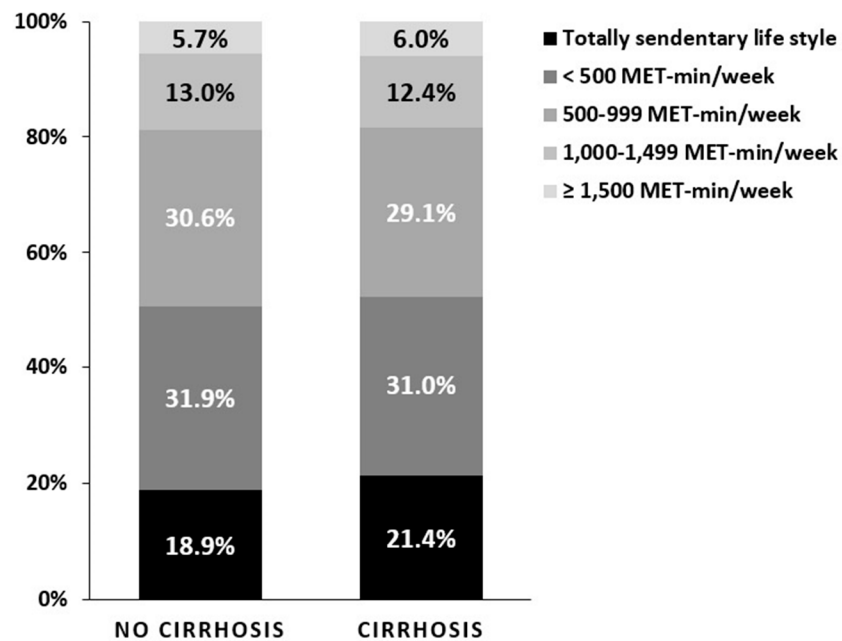

**Supplementary Fig. S2.** The proportions of physical activity classified into 5 categories stratified by sex. There was significant difference of the proportions of physical activity between the two groups ( $P<0.001$ ): male patients had more physical activity than female patients.

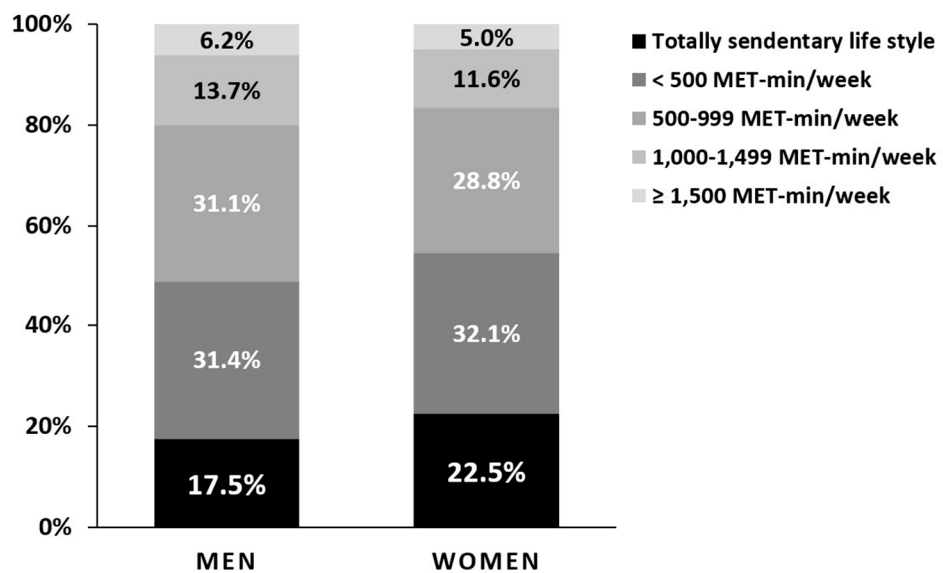

Supplement: s1 [file s1]
